# Supplementary material for: Treatment of Extramedullary Plasmacytoma of the Rectum with Endoscopic Mucosal Resection: A Case Report and Literature Review
Source: Research Square preprint supplement (doi:10.21203/rs.3.rs-1668309/v3), 2022-06-23
Supplement: Supplementary file 1 [file 0a8bc02387fa7bf99864920f.xlsx]

## Sheet: Sheet1
Case	Year	Author	Age	Gender	Clinical presentation	Treatment	Outcome
1	2022	Our case	54	Female	Diarrhea	EMR	No recurrence in 6 months follow-up
2	2021	Katarina	88	Male	Bloody diarrhea ,faecal incontinence and abdominal and back pain	None	Death
3	2021	Lin	80	Male	Alternating diarrhea and constipation	Surgical resection by laparoscope	Not mentioned
4	2018	Miwa	55	Male	Bloody diarrhea	EMR + local excision	No recurrence in 36 months follow-up
5	2015	Gohil	55	Male	Perineal pain and altered bowel habit	Abdominoperineal resection + radiotherapy	No recurrence in 14 months follow-up
6	2015	Hoton	60	Male	Hematochezia and diarrhea.	EMR	No recurrence in 8 months follow-up
7	2011	Nakagawa	84	Female	None	EMR	Not mentioned
8	2004	Hashiguchi	47	Male	Bloody diarrhea	EMR + radiotherapy	No recurrence in 6 months follow-up
9	1992	Pais	87	Female	None	polypectomy+ radiotherapy	No recurrence in 12 months follow-up
10	1987	Price	90	Female	Rectal bleeding and anemia	Radiotherapy	Regressed in 3 months follow-up
11	1987	Price	55	Male	Tenesmus	Radiotherapy	No recurrence in 36 months follow-up
12	1960	Sharma	50	Male	Difficult defecation	Operation	Loss to follow-up
13	1956	Hampton	41	Female	Rectal bleeding and tenesmus.	Operation	No recurrence in 12 months follow-up
14	1939	Brown	57	Male	Rectal bleeding	None	Death
